# Supplementary material for: Idiopathic Choroidal Neovascularization: Intraocular Inflammatory Cytokines and the Effect of Intravitreal Ranibizumab Treatment
Source: PubMed Central journal article supplement (PMC4997256; doi:10.1038/srep31880), 2016-08-25
Supplement: srep31880-s1.pdf [file srep31880-s1.pdf]

**Idiopathic Choroidal Neovascularization: Intraocular Inflammatory Cytokines  
and the Effect of Intravitreal Ranibizumab Treatment**

Houfa Yin, Xiaoyun Fang\*, Jian Ma, Min Chen, Yabo Yang, Shenchao Guo, Zhiqing  
Chen, Zhaoan Su, Lei Feng, Panpan Ye, Fang Wu & Jinfu Yin

Eye Center, Second Affiliated Hospital of Zhejiang University School of Medicine,  
Hangzhou, China. Correspondence and requests for materials should be addressed to  
X.F.( email: xiaoyunfang@zju.edu.cn)

|                                                           | <b>Subgroup A (n=15)</b> | <b>Subgroup B (n=24)</b> | <b>P value</b> |
|-----------------------------------------------------------|--------------------------|--------------------------|----------------|
| Sex, n (%)                                                |                          |                          | 0.317          |
| Male                                                      | 4 (26.7)                 | 11 (45.8)                |                |
| Female                                                    | 11 (73.3)                | 13 (54.2)                |                |
| Mean age of patients, yrs                                 | 32.1±7.4                 | 36.9±7.7                 | 0.062          |
| Mean axial length, mm                                     | 24.34±1.14               | 24.09±1.18               | 0.512          |
| Mean duration before IVR, d                               | 52.6±59.6                | 59.2±55.2                | 0.442          |
| Mean spherical equivalent, D                              | 2.93±1.83                | 2.10±1.87                | 0.144          |
| Location of CNV<br>(subfoveal/juxtafoveal/extrafoveal), n | 8/4/3                    | 11/6/7                   | 0.807          |
| BCVA, logMAR                                              |                          |                          |                |
| Baseline                                                  | 0.75±0.53                | 0.63±0.39                | 0.582          |
| Month 1                                                   | 0.23±0.31                | 0.27±0.26                | 0.332          |
| Month 12                                                  | 0.17±0.26                | 0.15±0.17                | 0.820          |
| CRT, um                                                   |                          |                          |                |
| Baseline                                                  | 335.87±93.89             | 365.42±81.56             | 0.306          |
| Month 1                                                   | 233.87±26.95             | 239.38±32.19             | 0.795          |
| Month 12                                                  | 215.27±19.46             | 221.58±19.90             | 0.322          |
| <b>Lesion area, mm<sup>2</sup></b>                        |                          |                          |                |
| <b>Baseline</b>                                           | <b>2.63±1.98</b>         | <b>2.31±1.62</b>         | <b>0.646</b>   |

Supplementary Table S1. Clinical characteristics of subgroup A and subgroup B. Subgroup A, patients who received 1 injection during the 12-month follow-up period. Subgroup B, patients who received 2 or more injections during the 12-month follow-up period. Data are presented as mean ±SD or n (%).
